# Community first response for cardiac arrest: comparing phased dispatch policies through Monte Carlo simulation

Pieter L. van den Berg<sup>a,f</sup>, Shane G. Henderson<sup>b</sup>,  
Hemeng Li<sup>b</sup>, Bridget Dicker<sup>c,d</sup>, Caroline J. Jagtenberg<sup>e</sup>

<sup>a</sup>*Rotterdam School of Management, Erasmus University Rotterdam, Burgemeester Oudlaan 50, 3062 PA, Rotterdam, the Netherlands, [vandenberg@rsm.nl](mailto:vandenberg@rsm.nl), corresponding author*

<sup>b</sup>*School of Operations Research and Information Engineering, Cornell University, Ithaca, NY, USA*

<sup>c</sup>*Clinical Audit and Research, Hato Hone St John New Zealand, Auckland, New Zealand*

<sup>d</sup>*Paramedicine Research Unit, Paramedicine Department, Auckland University of Technology, Auckland, New Zealand*

<sup>e</sup>*School of Business and Economics, Vrije Universiteit, Amsterdam, the Netherlands*

<sup>f</sup>*Corresponding author*

---

## Abstract

*Background* Advanced Community First Responder (CFR) systems send so-called phased alerts: notifications with built-in time delays. The policy that defines these delays affects response times, CFR workload and the number of redundant CFR arrivals.

*Methods* We compare policies by Monte Carlo Simulation, estimating the three metrics above. We bootstrap acceptance probabilities and response delays from 29,307 rows of historical data covering all GoodSAM alerts in New Zealand between 1-12-2017 and 30-11-2020. We simulate distances between the patient and CFRs by assuming that CFRs are located uniformly at random in a 1 km circle around the patient, for different CFR densities. Our simulated CFRs travel with a distance-dependent speed that was estimated by linear regression on observed speeds among those responders in the above-mentioned data set that eventually reached the patient.

*Results* The alerting policy has a large impact on the expected number of alerts sent, the redundant arrivals and the probability of patient survival. CFR app managers can use our results to identify a policy that displays a desirable trade-off between these performance measures.

*Keywords:* community first responders, volunteer alert, out-of-hospital cardiac arrest, Monte Carlo simulation

---

## 1. Introduction

Survival for out-of-hospital cardiac arrest (OHCA) can be significantly improved through bystander efforts.<sup>1</sup> To shorten the time to good-quality cardiopulmonary resuscitation (CPR), some emergency call centers use mobile phone technology to rapidly locate and alert nearby trained volunteers. A number of such community first responder (CFR) systems are active in, for example, the United States,<sup>2</sup> the United Kingdom<sup>3</sup> and Europe.<sup>4</sup>

While details may differ between CFR systems, most systems alert multiple volunteers for each patient, and volunteers take some random amount of time to notice their alert and determine whether they will go. Volunteers subsequently indicate on the smartphone app whether they accept or reject the alert, and in case of acceptance, proceed to the patient's location. Upon arrival, volunteers provide CPR until an ambulance takes over.

Since The International Liaison Committee on Resuscitation (ILCOR) identified a lack of literature on the effect of CFR systems in 2015,<sup>5</sup> several papers have been published that investigate systems through surveys<sup>6,2</sup> or retrospective data analysis<sup>7</sup> (see Table 2 in that paper). Many reported a positive impact, e.g., statistically significant improved survival to hospital discharge<sup>8</sup> or a lower degree of disability or dependence after survival.<sup>9</sup> One study applied Monte Carlo simulation to compare four hypothetical CFR systems by estimating response times and patient survival.<sup>10</sup>

Challenges for an effective CFR system include the activation radius and volunteer density.<sup>2</sup> One article studies densities of activated responders within a 1km circle and concludes that 10 volunteers /km<sup>2</sup> are needed.<sup>11</sup> A positive correlation between the fraction of inhabitants registered as volunteers and patient survival has been observed.<sup>12</sup> It is reasonable to assume that managerial decisions for activation radii are dependent on volunteer density.

Despite the recent growth in literature on CFR systems, there is no study systematically evaluating different *alerting policies*. An alerting policy prescribes which volunteer to alert when. Simple alerting policies alert up to a fixed number of volunteers, and/or up to a fixed radius around the patient, and send all alerts at once. More complex alerting policies may use *phased* alerts, sending alerts in batches with time lags in between, to see if previous ones have been accepted. Such a policy is used by St John New Zealand, an ambulance provider that deploys the CFR system GoodSAM. St John New Zealand configured the system to dispatch CFRs in batches of 3 with time lags of 30 seconds.

For a single patient, it is best to send many alerts at once, but this leads to a higher volunteer workload as well as an increased likelihood of multiple volunteers arriving on scene, which may diminish their perceived contribution. Both aspects can lead to a long-term negative impact on volunteers' willingness to respond. The question arises how the choice of alerting policy affects patient survival as well as volunteer fatigue.

We used Monte Carlo simulation to shed light on the question above, ultimately seeking to assist CFR system managers in understanding the consequences of their chosen alerting policy. We use historical data from GoodSAM responses in New Zealand between 2017 and 2020 to estimate travel times, as well as the probability of, and delay until, volunteer acceptance.

### 1.1. Preliminaries

The process of both CFR and EMS response is depicted in Figure 1. There, the name 'EMS response time' reflects the duration that is common for EMS providers to measure, and for which they often face targets and reporting obligations. For clarity, we have also added a 'GoodSAM response time', which starts at the moment the CFR system is activated.

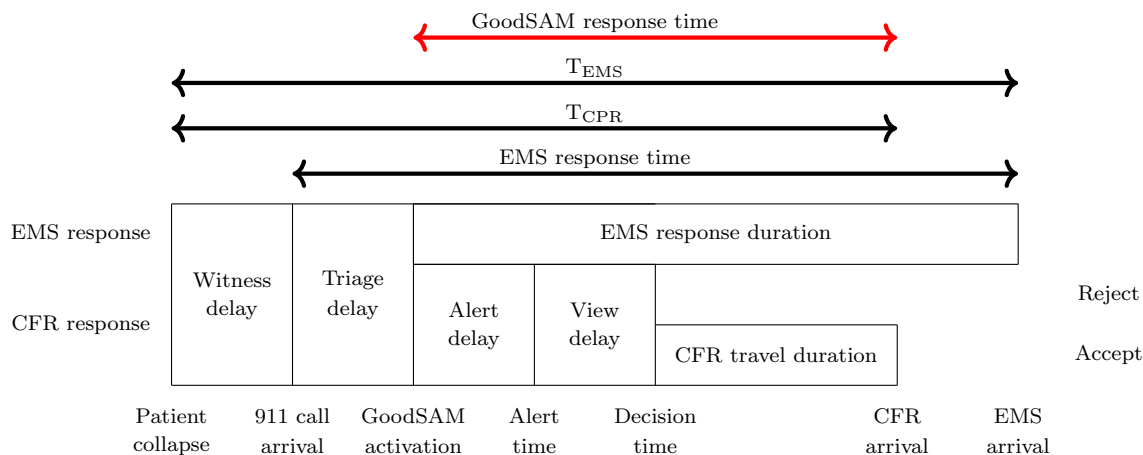

Figure 1: CFR response process.

44 EMS response times are measured from the moment of call arrival, so they are not ideal for  
 45 estimating OHCA survival: the time that has passed since patient collapse is more relevant. To  
 46 that end, we define another duration,  $T_{EMS}$ : the duration between patient collapse and EMS arrival.  
 47 Similarly, we define  $T_{CPR}$ : the duration between patient collapse and the arrival of the first responder,  
 48 regardless of whether this is a volunteer or EMS. This is summarized in Figure 1.

## 49 2. Material and methods

50 We applied Monte Carlo simulation to estimate the GoodSAM response time (see Figure 1) for  
 51 selected dispatch policies. This involved bootstrapping delay and acceptance probabilities from histor-  
 52 ical records of GoodSAM responses in New Zealand, see Section 2.1. We report the estimated expected  
 53 values of four key performance indicators (KPIs) described in Section 2.4.

### 54 2.1. Data

55 We used data obtained from the St John Ambulance Service, which operates the GoodSAM app  
 56 in New Zealand. The data covers all OHCA in the country between 1-12-2017 and 30-11-2020,  
 57 along with their location and 911 call arrival time. The data also contains which CFRs were alerted  
 58 through GoodSAM, at what time, and what their location was at the time of notification (*alert time*  
 59 in Figure 1). Moreover, the data contains the time at which the volunteer reacted (*decision time*) by  
 60 either accepting or rejecting the alert. Finally, the time volunteers arrived on scene (*CFR arrival*)  
 61 is determined by the system, based on GPS signal. The data contains a total of 29,307 CFR alerts,  
 62 which were either accepted (4009), accepted and dropped later (1199), rejected (7925), or not seen  
 63 (16,174). From the 4009 accepting volunteers, 1776 eventually reached the patient.

64 For the view delay, we measured the duration between the alert time and the decision time. We  
 65 ignored entries for which the alert time was equal to ‘nan’ (thereby excluding 1 entry). If the decision  
 66 time was not listed, which is the case for not-seen alerts, we set the view delay to infinity. We treated  
 67 both accepted and accepted-but-dropped-later entries as accepts, and we treated rejected and not-seen  
 68 as rejects. This led to an empirical acceptance rate of  $\frac{4009+1199}{29,307} \approx 17.77\%$ . Figure 2 shows the empirical  
 69 view delay distribution, as well as the probability of an accept, given a certain view delay. Not-seen  
 70 alerts are not visible in this plot as these have an infinite view delay.

71 Acceptance rates in Australia and New Zealand were found to be similar to those reported for other  
 72 CFR smartphone apps.<sup>6</sup>

73 The CFR’s travel duration depends on their distance from the patient. Locations and travel times  
 74 were only recorded for *alerted* CFRs, so we cannot observe information on non-alerted individuals.  
 75 However, in our counterfactual simulations those CFRs *may* be alerted, so we estimate their distances  
 76 using Monte Carlo simulation. For each CFR that is within 1km of the patient, we simulate their  
 77 location uniformly at random in this circle.

78 To translate distance into travel time, we used empirical data on volunteer’s travel speed, condi-  
 79 tioning on the distance between volunteer and patient. We excluded observations with a travel time of

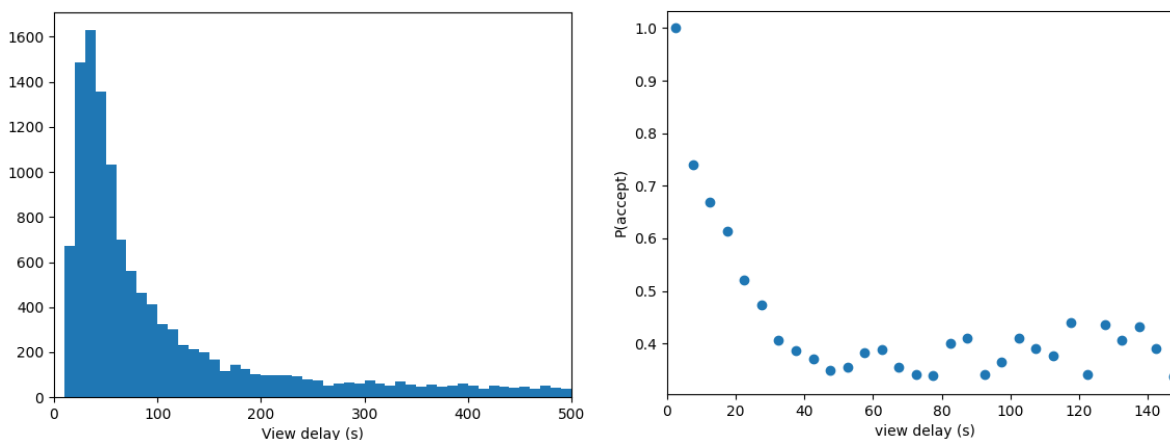

Figure 2: Historical view delays and acceptance probabilities as observed on GoodSAM in New Zealand.

80 0 seconds. We discretized the distances in 100-meter blocks and for each block, took the median speed of  
81 all volunteer responses in the data. We excluded the data for responses between 0 and 100 meters  
82 as we considered these less reliable. We then performed linear regression on the remaining medians to  
83 estimate the relationship between distance and speed.

## 84 2.2. Policies

85 We consider so-called alerting policies, which may base the decision to send an alert on the amount  
86 of time that has passed, and/or the responses that are received from previously alerted volunteers.  
87 Our policies only alert a more distant volunteer when all closer volunteers are already alerted. This  
88 helps to narrow down the set of all policies to realistic and promising ones. We further assume that  
89 no alerts are sent out after a volunteer accepts an alert, or 10 minutes have passed after GoodSAM  
90 activation, whichever comes first.

91 We evaluate the following policies:

- 92 1. *Send all at time 0*: alert all available volunteers within the dispatch radius immediately upon  
93 GoodSAM activation, which we call time 0.
- 94 2. *Send  $n$  at time 0*: Alert  $n$  volunteers immediately at time 0, and send no alerts after.
- 95 3. *Keep- $n$ -active*: Alert  $n$  volunteers at time 0 and replace every incoming reject with an additional  
96 alert.
- 97 4. *NZ current policy*: Alert 3 volunteers at time 0 and 3 additional volunteers every 30 seconds  
98 until one volunteer accepts the alert, or 10 minutes have passed.

99 For *send  $n$  at time 0*, we consider the values of  $n$  between 1 and 15. For *keep- $n$ -active* we consider  
100 values of  $n$  between 1 and 10. This gives a total of 27 policies.

## 101 2.3. Simulation

102 To estimate performance for the different policies, we applied Monte Carlo simulation, considering  
103 two sources of uncertainty: 1) the distance between the volunteers and the patient, and 2) the view  
104 delay and reply of alerted volunteers. The simulation evaluates 1,000 different OHCA. For each  
105 OHCA, their CFR view delays and corresponding replies were bootstrapped 10,000 times from the  
106 empirical data. Each view delay and reply were jointly sampled to maintain the statistical dependence  
107 between the time a volunteer takes to respond and the likelihood that the reply is ‘accept’ (see Figure  
108 2). This calculation estimates all KPIs with very narrow confidence intervals.

## 109 2.4. Performance metrics

110 We consider two KPIs related to the quality of care and two KPIs related to the inconvenience  
111 caused to volunteers.

112 **Coverage**: fraction of incidents that receive a CFR response within a given time threshold. We  
113 define this on the ‘GoodSAM response time’ (see Figure 1) and use a threshold of 5 minutes.

114 **Lives saved:** the number of OHCA patients that are expected to survive until hospital discharge,  
 115 in New Zealand, annually. This number is estimated using the relationship between time to CPR, time  
 116 to EMS ( $T_{\text{CPR}}$  and  $T_{\text{EMS}}$  in Figure 1) and the probability of survival as modeled by Waalewijn et  
 117 al.<sup>13</sup> We assumed a  $T_{\text{EMS}}$  of 13 minutes as this is St John New Zealand’s target for urgent requests.<sup>14</sup>  
 118 To estimate  $T_{\text{CPR}}$ , we further need to estimate the ‘Witness delay’, which we assumed to be 1 minute,  
 119 and the ‘Triage delay’, for which we used 124 sec (the median of the data).

120 The resulting survival percentage was converted to lives saved, by multiplying it by 5,141, which  
 121 is the nationally observed number of OHCA’s per year.<sup>15</sup>

122 **Number of alerts:** the average number of alerts sent per incident.

123 **Redundant arrivals:** the average number of volunteers arriving on scene after the first responder,  
 124 per incident.

125

126 The relative performance of the different policies depends on the number of volunteers. This  
 127 number depends on the density of volunteers in an area. We evaluated the different policies under a  
 128 low (10 volunteers within 1km), medium (30 volunteers within 1km) and high (100 volunteers within  
 129 1km) density of volunteers. These densities roughly correspond to what would be found in Auckland,  
 130 New Zealand if 0.2% of the inhabitants signed up (low), what is recommended in<sup>11</sup> (medium) and our  
 131 estimate for central Amsterdam (high).

### 132 3. Results

#### 133 3.1. Parameter estimation

134 Figure 3a shows the observed median travel speeds for different distances, which increase with  
 135 distance. Linear regression of travel speeds in km/h,  $y$ , on distances in meters,  $x$ , based only on the  
 136 distances above 100 meters has an  $R^2$  of 0.96 and yields the relationship

$$y = 1.83 + 0.0108x. \quad (1)$$

137 The resulting relationship between the distance in meters and travel time in minutes, plotted in  
 138 Figure 3b, is

$$travelTime(x) = \frac{60x}{1830 + 10.8x}. \quad (2)$$

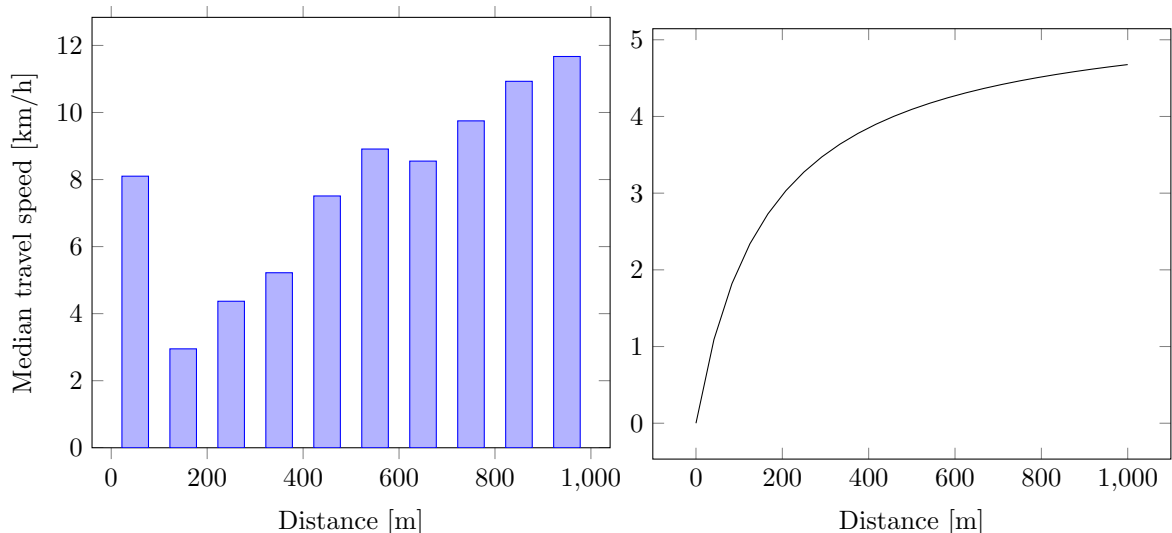

(a) Median travel speed depending on distance to patient.

(b) Estimated travel time depending on distance to patient.

Figure 3: Distance-dependent travel times estimated based on historical data.

### 139 3.2. Performance of policies

140 Tables 1-3 show the results for the different policies for a low, medium and high number of vol-  
141 unteers. For reference, alerting 0 volunteers would lead to 98 survivors, 0 redundant arrivals, 0 alerts  
142 and 0 coverage.

143 By only alerting the closest volunteer, the number of survivors can be increased to 120, 124, or  
144 129, for 10, 30 or 100 volunteers within 1km, respectively. For coverage, the contribution of the closest  
145 volunteer is 11.9%, 13.4%, or 14.5%, respectively.

146 Comparing policies *Send n alerts at time 0*, with *Keep n alerts active* indicates that a similar level  
147 of survival can be obtained with 1 alert less at time 0, by replacing rejects with additional alerts. This  
148 would reduce the impact of the alerts on the volunteers (both in terms of redundant arrivals as well  
149 as the number of alerts) without sacrificing survival.

150 The current policy used by GoodSAM in New Zealand on average leads to sending out 11.4 alerts  
151 per incident, if sufficiently many volunteers are within 1km from the patient. The corresponding  
152 number of expected survivors per year is 181, 205, or 229 for a low, medium and high number of  
153 volunteers. Coverage as a result of this policy is estimated at 28.1%, 43.6%, or 61.5%, respectively.

154 The policy that sends an alert to all volunteers at time 0 by definition yields the highest estimated  
155 survival (191, 231 and 259 survivors per year) and coverage (42.3%, 80.7% and 99.6%), but also gives  
156 the highest estimated number of redundant arrivals (0.919, 4.333 and 16.77) and alerts.

## 157 4. Discussion

158 The trade-offs between the KPIs in Tables 1-3 help a CFR system manager to identify a desirable  
159 dispatch policy. This choice will likely depend on the volunteer density in the region. Our reported  
160 number of volunteers within 1 km of the patient has a direct relationship with the volunteer density.  
161 The three cases we considered correspond to a density of 3.18 vol/km<sup>2</sup>, 9.55 vol/km<sup>2</sup>, and 31.83  
162 vol/km<sup>2</sup>, respectively. For reference, the literature recommends a volunteer density of at least 10  
163 vol/km<sup>2</sup>.<sup>11</sup>

164 The insight that a different density might lead to a different preferred policy might be somewhat new  
165 in the academic literature; however, it was already known to GoodSAM. For this reason, their system  
166 offers the ability to configure different rules for urban and rural areas, which is done by uploading  
167 KML files that represent parts of the map. This feature implies that potential insights from this paper  
168 can readily be implemented in practice.

169 Alerting the same number of volunteers leads to higher expected survival and better coverage as  
170 volunteer density increases. This effect is visible throughout Tables 1-3, and also holds in generality,  
171 assuming all other system parameters remain equal. The reason is that the  $n$ -th closest volunteer is  
172 expected to be nearer to the patient when volunteer density is higher.

173 Comparing policies *Send 6 alerts at time 0* and *Send 10 alerts at time 0* shows different survival  
174 numbers for different volunteer densities. In Table 1 the difference is 13 lives, while in Table 3 it is 24  
175 lives. The reason is that in Table 1, the 6th-10th volunteers are farther from the patient than they are  
176 in Table 3.

177 Perhaps more surprising is that the policy *Send 6 alerts at time 0* gives approximately the same  
178 survival probability as *Keep 5 alerts active*, and that this is the case in each of the three tables. We  
179 have no intuition for this, but conjecture that this result would be found for any volunteer density  
180 within the entire range of 3.18 – 31.83 vol/km<sup>2</sup>.

181 The current strategy in New Zealand of alerting volunteers in batches of three with 30-second  
182 intervals leads to few redundant arrivals, but at a low volunteer density, this comes at a high cost in  
183 terms of coverage. This insight might be a reason to fine-tune the number of alerts per batch and the  
184 interval between batches to better align with the view delay and acceptance probability, especially in  
185 sparsely populated parts of the country.

186 A limitation of this study is that the time on-scene is based on the geolocation of the phone which  
187 may have some error in it due to gaps in cell tower coverage and the resulting inability to ping the  
188 phone when it is in the vicinity of the patient. It is unknown how often this situation occurs. The  
189 stop-gap to this is that responders can also manually generate a time on scene by pressing a button  
190 on the app, but responders do not always do this.

191 Another limitation is that we focused on volunteers who directly go to the patient to provide  
192 CPR. However, in practice, certain CFR systems differentiate alerts, directing some volunteers to



193 immediately attend to the patient and others to retrieve an Automated External Defibrillator (AED).  
194 Such a system raises new questions; answering those questions would require an extension of our  
195 methods.

196 We limited attention to policies that alert far-away volunteers only if all nearer ones have already  
197 been alerted. While this choice may seem restrictive, these policies are optimal when we do not have  
198 volunteer-specific knowledge. While some CFR systems collect volunteer-specific parameters such as  
199 acceptance rates, to the best of our knowledge, no system currently uses this information in their  
200 real-time dispatch decisions.

201 We explored results for three different volunteer densities, but a CFR system will have varying  
202 volunteer densities throughout the day and the region. It might then be worthwhile to differentiate  
203 the dispatch policy within one system through times of the day and parts of the region. Accurately  
204 evaluating such a CFR system would require running simulations with the correct mix of densities and  
205 policies, thereby introducing complexity and likely diminishing insight. Therefore we decided not to  
206 pursue that approach here.

207 Although it is plausible that a high number of alerts and/or redundant arrivals reduce future CFR  
208 engagement, there is, to the best of our knowledge, no study that quantifies the magnitude of this effect.  
209 We welcome such studies, as they might aid in designing even better dispatch policies. The current  
210 knowledge gap led us to refrain from recommending a specific dispatch policy, instead presenting a list  
211 of options from which a CFR system manager can choose.

212 Future research might address more sophisticated policies. For example, we conjecture that it would  
213 be a good idea to consider a CFR as inactive when they have not responded for some prescribed time.  
214 Moreover, it could be useful to let the chosen policy depend on the real-time locations of volunteers  
215 and the time of day. If, for example, the third volunteer is far from the patient, it might be better to  
216 alert only two, and more alerts might be sent at times when volunteers are less likely to respond.

## 217 **5. Conclusions**

218 A CFR system's dispatch policy affects the trade-off between the number of alerts, redundant  
219 arrivals, and patient survival. In comparison to sending all alerts immediately, it is beneficial to send a  
220 reduced number of alerts immediately plus additional alerts upon receiving rejections. This reduces the  
221 number of redundant arrivals as well as the number of alerts, without losing much in terms of patient  
222 survival. The benefit of such a policy increases with an increasing number of volunteers around the  
223 patient.

224 This paper quantified KPI trade-offs for several reasonable dispatch policies and varying volunteer  
225 densities, and hence can guide CFR system managers in choosing a policy that suits their region. The  
226 choice likely depends on the volunteer density in the region and might even be differentiated within  
227 one system if volunteer densities vary over the day and between different parts of the region.

228 We hope that this article will stimulate discussion on phased dispatching of CFRs and pave the  
229 way for incorporating methods from the field of operations research in designing improved dispatch  
230 policies.

## 231 **Conflicts of Interest**

232 None.

## 233 **Acknowledgements**

234 We thank GoodSAM and St John Ambulance Service New Zealand for access to data.

235 Funding: This work was supported by the Dutch Institute for Advanced Logistics (TKI Dinalog)  
236 [grant number 2023-1-307TKI], the Netherlands Organization for Scientific Research (NWO) [grant  
237 number VI.Veni.191E.005] and the (USA) National Science Foundation [grant number CMMI-2035086].

## 238 References

- 239 <sup>1</sup> Kristian Kragholm, Mads Wissenberg, Rikke N Mortensen, Steen M Hansen, Carolina Malta Hansen,  
240 Kristinn Thorsteinsson, Shahzleen Rajan, Freddy Lippert, Fredrik Folke, Gunnar Gislason, et al.  
241 Bystander efforts and 1-year outcomes in out-of-hospital cardiac arrest. *New Engl. J. Med.*,  
242 376(18):1737–1747, 2017.
- 243 <sup>2</sup> Steven C Brooks, Graydon Simmons, Heather Worthington, Bentley J Bobrow, and Laurie J Morri-  
244 son. The PulsePoint Respond mobile device application to crowdsource basic life support for patients  
245 with out-of-hospital cardiac arrest: challenges for optimal implementation. *Resuscitation*, 98:20–26,  
246 2016.
- 247 <sup>3</sup> Christopher M Smith, Mark H Wilson, Ali Ghorbangholi, Christopher Hartley-Sharpe, Carl Gwin-  
248 nutt, Bridget Dicker, and Gavin D Perkins. The use of trained volunteers in the response to out-of-  
249 hospital cardiac arrest—the GoodSAM experience. *Resuscitation*, 121:123–126, 2017.
- 250 <sup>4</sup> Iris Oving, Siobhan Masterson, Ingvild BM Tjelmeland, Martin Jonsson, Federico Semeraro, Mattias  
251 Ringh, Anatolij Truhlar, Diana Cimpoesu, Fredrik Folke, Stefanie G Beesems, et al. First-response  
252 treatment after out-of-hospital cardiac arrest: a survey of current practices across 29 countries in  
253 Europe. *Scand. J. Trauma, Resusc. Emerg. Med.*, 27(1):112, 2019.
- 254 <sup>5</sup> Gavin D Perkins, Andrew H Travers, Robert A Berg, Maaret Castren, Julie Considine, Raffo Es-  
255 calante, Raul J Gazmuri, Rudolph W Koster, Swee Han Lim, Kevin J Nation, et al. Part 3: adult  
256 basic life support and automated external defibrillation: 2015 international consensus on cardiopul-  
257 monary resuscitation and emergency cardiovascular care science with treatment recommendations.  
258 *Resuscitation*, 95:e43–e69, 2015.
- 259 <sup>6</sup> Brian Haskins, Ziad Nehme, Bridget Dicker, Mark H Wilson, Michael Ray, Stephen Bernard, Peter  
260 Cameron, and Karen Smith. A binational survey of smartphone activated volunteer responders for  
261 out-of-hospital cardiac arrest: availability, interventions, and post-traumatic stress. *Resuscitation*,  
262 169:67–75, 2021.
- 263 <sup>7</sup> Ailish Valeriano, Shyan Van Heer, François de Champlain, and Steven C. Brooks. Crowdsourcing  
264 to save lives: A scoping review of bystander alert technologies for out-of-hospital cardiac arrest.  
265 *Resuscitation*, 158:94–121, 2021.
- 266 <sup>8</sup> Christopher M Smith, Ranjit Lall, Rachael T Fothergill, Robert Spaight, and Gavin D Perkins.  
267 The effect of the GoodSAM volunteer first-responder app on survival to hospital discharge following  
268 out-of-hospital cardiac arrest. *Eur. Heart J. Acute Cardiovasc. Care*, 11(1):20–31, 2022.
- 269 <sup>9</sup> Ruud WM Pijls, Patty J Nelemans, Braim M Rahel, and Anton PM Gorgels. A text message  
270 alert system for trained volunteers improves out-of-hospital cardiac arrest survival. *Resuscitation*,  
271 105:182–187, 2016.
- 272 <sup>10</sup> Greg Lancaster and Jeffrey W Herrmann. Computer simulation of the effectiveness of novel cardiac  
273 arrest response systems. *Resusc. Plus*, 7:100153, 2021.
- 274 <sup>11</sup> Remy Stieglis, Jolande A Zijlstra, Frank Riedijk, Martin Smeekes, Wim E van der Worp, and  
275 Rudolph W Koster. AED and text message responders density in residential areas for rapid response  
276 in out-of-hospital cardiac arrest. *Resuscitation*, 150:170–177, 2020.
- 277 <sup>12</sup> Ruud WM Pijls, Patty J Nelemans, Braim M Rahel, and Anton PM Gorgels. Characteristics of  
278 a novel citizen rescue system for out-of-hospital cardiac arrest in the Dutch province of Limburg:  
279 relation to incidence and survival. *Neth. Heart J.*, 27(2):100–107, 2019.
- 280 <sup>13</sup> Reinier A Waalewijn, Rien de Vos, Jan GP Tijssen, and Rudolph W Koster. Survival models  
281 for out-of-hospital cardiopulmonary resuscitation from the perspectives of the bystander, the first  
282 responder, and the paramedic. *Resuscitation*, 51(2):113–122, 2001.
- 283 <sup>14</sup> Ministry of Health. Emergency ambulance service national performance report. [https://www.tewhātuora.govt.nz/assets/Our-health-system/Who-were-working-with/NASO/  
284 Naso-monthly-reports/NASO-monthly-report-2021\\_2022-without-page3-April-2022.pdf](https://www.tewhātuora.govt.nz/assets/Our-health-system/Who-were-working-with/NASO/Naso-monthly-reports/NASO-monthly-report-2021_2022-without-page3-April-2022.pdf),  
285 2022.  
286



287 <sup>15</sup> Janet Bray, Stuart Howell, Stephen Ball, Tan Doan, Emma Bosley, Karen Smith, Bridget Dicker,  
288 Steven Faddy, Melanie Thorrowgood, Andy Swain, et al. The epidemiology of out-of-hospital cardiac  
289 arrest in Australia and New Zealand: A binational report from the Australasian Resuscitation  
290 Outcomes Consortium (Aus-ROC). *Resuscitation*, 172:74–83, 2022.

| Policy                    | Coverage | Survivors per year | Nr of alerts | Redundant arrivals |
|---------------------------|----------|--------------------|--------------|--------------------|
| Send all at time 0.       | 0.428    | 191                | 10.0         | 0.918              |
| Keep 1 alerts active.     | 0.125    | 123                | 1.3          | 0.000              |
| Keep 2 alerts active.     | 0.210    | 140                | 2.6          | 0.041              |
| Keep 3 alerts active.     | 0.273    | 153                | 3.8          | 0.114              |
| Keep 4 alerts active.     | 0.320    | 163                | 4.9          | 0.211              |
| Keep 5 alerts active.     | 0.355    | 172                | 6.0          | 0.326              |
| Keep 6 alerts active.     | 0.381    | 178                | 7.0          | 0.453              |
| Keep 7 alerts active.     | 0.399    | 184                | 8.0          | 0.587              |
| Keep 8 alerts active.     | 0.413    | 188                | 8.8          | 0.718              |
| Keep 9 alerts active.     | 0.422    | 190                | 9.5          | 0.834              |
| Keep 10 alerts active.    | 0.428    | 191                | 10.0         | 0.918              |
| Send 1 alerts at time 0.  | 0.119    | 120                | 1.0          | 0.000              |
| Send 2 alerts at time 0.  | 0.205    | 135                | 2.0          | 0.032              |
| Send 3 alerts at time 0.  | 0.270    | 148                | 3.0          | 0.089              |
| Send 4 alerts at time 0.  | 0.318    | 158                | 4.0          | 0.168              |
| Send 5 alerts at time 0.  | 0.354    | 166                | 5.0          | 0.264              |
| Send 6 alerts at time 0.  | 0.380    | 173                | 6.0          | 0.375              |
| Send 7 alerts at time 0.  | 0.399    | 179                | 7.0          | 0.498              |
| Send 8 alerts at time 0.  | 0.413    | 184                | 8.0          | 0.630              |
| Send 9 alerts at time 0.  | 0.422    | 188                | 9.0          | 0.771              |
| Send 10 alerts at time 0. | 0.428    | 191                | 10.0         | 0.918              |
| NZ current strategy.      | 0.283    | 181                | 8.1          | 0.574              |

Table 1: Results for  $n = 10$  volunteers within 1 km, based on 1000 simulated volunteer locations, with 10000 view delay and acceptance simulations each. The maximum confidence interval halfwidth as a fraction of the mean among all these numbers was 0.013 (ignoring those cases where the mean was zero). Policies that send more than 10 alerts at time 0 are omitted, as there are only 10 eligible volunteers in this situation.

| Policy                    | Coverage | Survivors per year | Nr of alerts | Redundant arrivals |
|---------------------------|----------|--------------------|--------------|--------------------|
| Send all at time 0.       | 0.806    | 231                | 30.0         | 4.333              |
| Keep 1 alerts active.     | 0.149    | 128                | 1.3          | 0.000              |
| Keep 2 alerts active.     | 0.258    | 148                | 2.6          | 0.041              |
| Keep 3 alerts active.     | 0.343    | 164                | 3.8          | 0.114              |
| Keep 4 alerts active.     | 0.411    | 176                | 4.9          | 0.211              |
| Keep 5 alerts active.     | 0.468    | 185                | 6.0          | 0.326              |
| Keep 6 alerts active.     | 0.516    | 193                | 7.1          | 0.455              |
| Keep 7 alerts active.     | 0.556    | 199                | 8.1          | 0.595              |
| Keep 8 alerts active.     | 0.591    | 205                | 9.2          | 0.743              |
| Keep 9 alerts active.     | 0.620    | 209                | 10.2         | 0.897              |
| Keep 10 alerts active.    | 0.646    | 213                | 11.2         | 1.056              |
| Send 1 alerts at time 0.  | 0.134    | 124                | 1.0          | 0.000              |
| Send 2 alerts at time 0.  | 0.240    | 142                | 2.0          | 0.032              |
| Send 3 alerts at time 0.  | 0.326    | 157                | 3.0          | 0.089              |
| Send 4 alerts at time 0.  | 0.398    | 169                | 4.0          | 0.168              |
| Send 5 alerts at time 0.  | 0.457    | 178                | 5.0          | 0.264              |
| Send 6 alerts at time 0.  | 0.507    | 186                | 6.0          | 0.375              |
| Send 7 alerts at time 0.  | 0.550    | 193                | 7.0          | 0.498              |
| Send 8 alerts at time 0.  | 0.586    | 199                | 8.0          | 0.631              |
| Send 9 alerts at time 0.  | 0.617    | 203                | 9.0          | 0.771              |
| Send 10 alerts at time 0. | 0.643    | 207                | 10.0         | 0.918              |
| Send 11 alerts at time 0. | 0.666    | 211                | 11.0         | 1.071              |
| Send 12 alerts at time 0. | 0.686    | 214                | 12.0         | 1.228              |
| Send 13 alerts at time 0. | 0.703    | 216                | 13.0         | 1.389              |
| Send 14 alerts at time 0. | 0.718    | 218                | 14.0         | 1.552              |
| Send 15 alerts at time 0. | 0.731    | 220                | 15.0         | 1.719              |
| NZ current strategy.      | 0.434    | 205                | 11.3         | 1.002              |

Table 2: Results for  $n = 30$  volunteers within 1 km, based on 1000 simulated volunteer locations, with 10000 view delay and acceptance simulations each. The maximum confidence interval halfwidth as a fraction of the mean among all these numbers was 0.009 (ignoring those cases where the mean was zero.)

| Policy                    | Coverage | Survivors per year | Nr of alerts | Redundant arrivals |
|---------------------------|----------|--------------------|--------------|--------------------|
| Send all at time 0.       | 0.996    | 259                | 100.0        | 16.768             |
| Keep 1 alerts active.     | 0.168    | 134                | 1.3          | 0.000              |
| Keep 2 alerts active.     | 0.297    | 159                | 2.6          | 0.042              |
| Keep 3 alerts active.     | 0.400    | 178                | 3.8          | 0.114              |
| Keep 4 alerts active.     | 0.484    | 193                | 4.9          | 0.211              |
| Keep 5 alerts active.     | 0.552    | 205                | 6.0          | 0.326              |
| Keep 6 alerts active.     | 0.609    | 214                | 7.1          | 0.456              |
| Keep 7 alerts active.     | 0.657    | 222                | 8.1          | 0.595              |
| Keep 8 alerts active.     | 0.698    | 228                | 9.2          | 0.743              |
| Keep 9 alerts active.     | 0.733    | 233                | 10.2         | 0.897              |
| Keep 10 alerts active.    | 0.763    | 237                | 11.2         | 1.056              |
| Send 1 alerts at time 0.  | 0.145    | 129                | 1.0          | 0.000              |
| Send 2 alerts at time 0.  | 0.263    | 152                | 2.0          | 0.032              |
| Send 3 alerts at time 0.  | 0.362    | 170                | 3.0          | 0.089              |
| Send 4 alerts at time 0.  | 0.445    | 184                | 4.0          | 0.168              |
| Send 5 alerts at time 0.  | 0.515    | 196                | 5.0          | 0.265              |
| Send 6 alerts at time 0.  | 0.575    | 205                | 6.0          | 0.375              |
| Send 7 alerts at time 0.  | 0.626    | 214                | 7.0          | 0.498              |
| Send 8 alerts at time 0.  | 0.670    | 220                | 8.0          | 0.631              |
| Send 9 alerts at time 0.  | 0.708    | 226                | 9.0          | 0.771              |
| Send 10 alerts at time 0. | 0.740    | 231                | 10.0         | 0.918              |
| Send 11 alerts at time 0. | 0.769    | 235                | 11.0         | 1.071              |
| Send 12 alerts at time 0. | 0.794    | 238                | 12.0         | 1.228              |
| Send 13 alerts at time 0. | 0.815    | 241                | 13.0         | 1.388              |
| Send 14 alerts at time 0. | 0.834    | 244                | 14.0         | 1.552              |
| Send 15 alerts at time 0. | 0.851    | 246                | 15.0         | 1.718              |
| NZ current strategy.      | 0.615    | 229                | 11.4         | 1.021              |

Table 3: Results for  $n = 100$  volunteers within 1 km, based on 1000 simulated volunteer locations, with 10000 view delay and acceptance simulations each. The maximum confidence interval halfwidth as a fraction of the mean among all these numbers was 0.005 (ignoring those cases where the mean was zero.)
